# Supplementary material for: An Easy and Reliable Strategy for Making Type I Interferon Signature Analysis Comparable among Research Centers
Source: PubMed Central journal article supplement (PMC6787630; doi:10.3390/diagnostics9030113), 2019-09-04
Supplement: diagnostics-09-00113-s001.pdf [file diagnostics-09-00113-s001.pdf]

## Supplementary Materials

**Table S1.** Patient's clinical diagnosis. SAVI: STING-associated vasculopathy with onset in infancy.

| Subject n. | Clinical Diagnosis             |
|------------|--------------------------------|
| 1          | SAVI-like disease              |
| 2          | Patient's relative             |
| 3          | Patient's relative             |
| 4          | SAVI-like disease              |
| 5          | Patient's relative             |
| 6          | CANDLE syndrome                |
| 7          | Sarcoidosis                    |
| 8          | Wiskott Aldrich syndrome       |
| 9          | Trichohepatoenteric syndrome 1 |
| 10         | Dyskeratosis congenita         |
| 11         | DNase II deficiency            |
| 12         | CANDLE syndrome                |
| 13         | CANDLE syndrome                |
| 14         | AGS-like                       |
| 15         | SLE                            |
| 16         | Copa syndrome                  |
| 17         | Patient's relative             |
| 18         | Patient's relative             |
| 19         | IPEX-like syndrome             |
| 20         | LRBA deficiency                |

CANDLE: IFN-mediated disease chronic atypical neutrophilic dermatosis with lipodystrophy and elevated temperature, AGS: Aicardi-Goutières syndrome, SLE: Systemic lupus erythematosus, IPEX: Immunodysregulation polyendocrinopathy enteropathy X-linked.

**Table S2.** Twenty-controls-sized group ISGs expression values.

| Control n. | IFI27 | IFI44L | IFIT1 | ISG15 | RSAD2 | SIGLEC1 |
|------------|-------|--------|-------|-------|-------|---------|
| 1          | 0.96  | 1.46   | 6.19  | 43.69 | 3.10  | 1.00    |
| 2          | 0.42  | 1.42   | 8.00  | 42.03 | 3.76  | 1.77    |
| 3          | 0.36  | 0.97   | 5.16  | 35.46 | 3.72  | 0.94    |
| 4          | 0.07  | 1.12   | 3.51  | 21.14 | 1.71  | 0.75    |
| 5          | 0.54  | 1.07   | 4.50  | 21.29 | 0.72  | 0.68    |
| 6          | 1.00  | 1.10   | 5.50  | 45.11 | 2.05  | 2.47    |
| 7          | 0.22  | 1.16   | 4.94  | 33.67 | 1.55  | 1.80    |
| 8          | 0.38  | 0.63   | 3.48  | 43.04 | 1.64  | 0.33    |
| 9          | 0.52  | 1.31   | 3.53  | 49.16 | 1.30  | 1.20    |
| 10         | 0.28  | 0.79   | 5.14  | 27.07 | 1.76  | 0.86    |
| 11         | 0.33  | 0.88   | 4.90  | 22.76 | 2.32  | 0.68    |
| 12         | 0.33  | 1.72   | 4.17  | 11.75 | 2.40  | 1.09    |
| 13         | 0.25  | 1.20   | 6.05  | 14.02 | 2.55  | 1.52    |
| 14         | 0.14  | 0.95   | 4.10  | 15.38 | 1.82  | 0.98    |
| 15         | 0.38  | 1.36   | 6.80  | 27.00 | 2.81  | 1.55    |
| 16         | 0.18  | 2.02   | 5.62  | 16.71 | 2.90  | 1.85    |
| 17         | 0.11  | 2.17   | 7.63  | 17.22 | 4.10  | 1.30    |
| 18         | 0.13  | 1.25   | 5.08  | 15.56 | 2.62  | 1.24    |
| 19         | 0.22  | 1.12   | 2.88  | 34.90 | 1.88  | 1.29    |
| 20         | 0.60  | 1.40   | 6.13  | 64.74 | 4.60  | 1.08    |
